# Supplementary material for: Breast Cancer Screening in Women With Schizophrenia: A Systematic Review and Meta-Analysis
Source: Atypon-hosted journal article supplement (doi:10.1176/appi.ps.201900318), 2019-11-14
Supplement: appi.ps.201900318.ds001.pdf [file appi.ps.201900318.ds001.pdf]

### Literature Search Flow Diagram

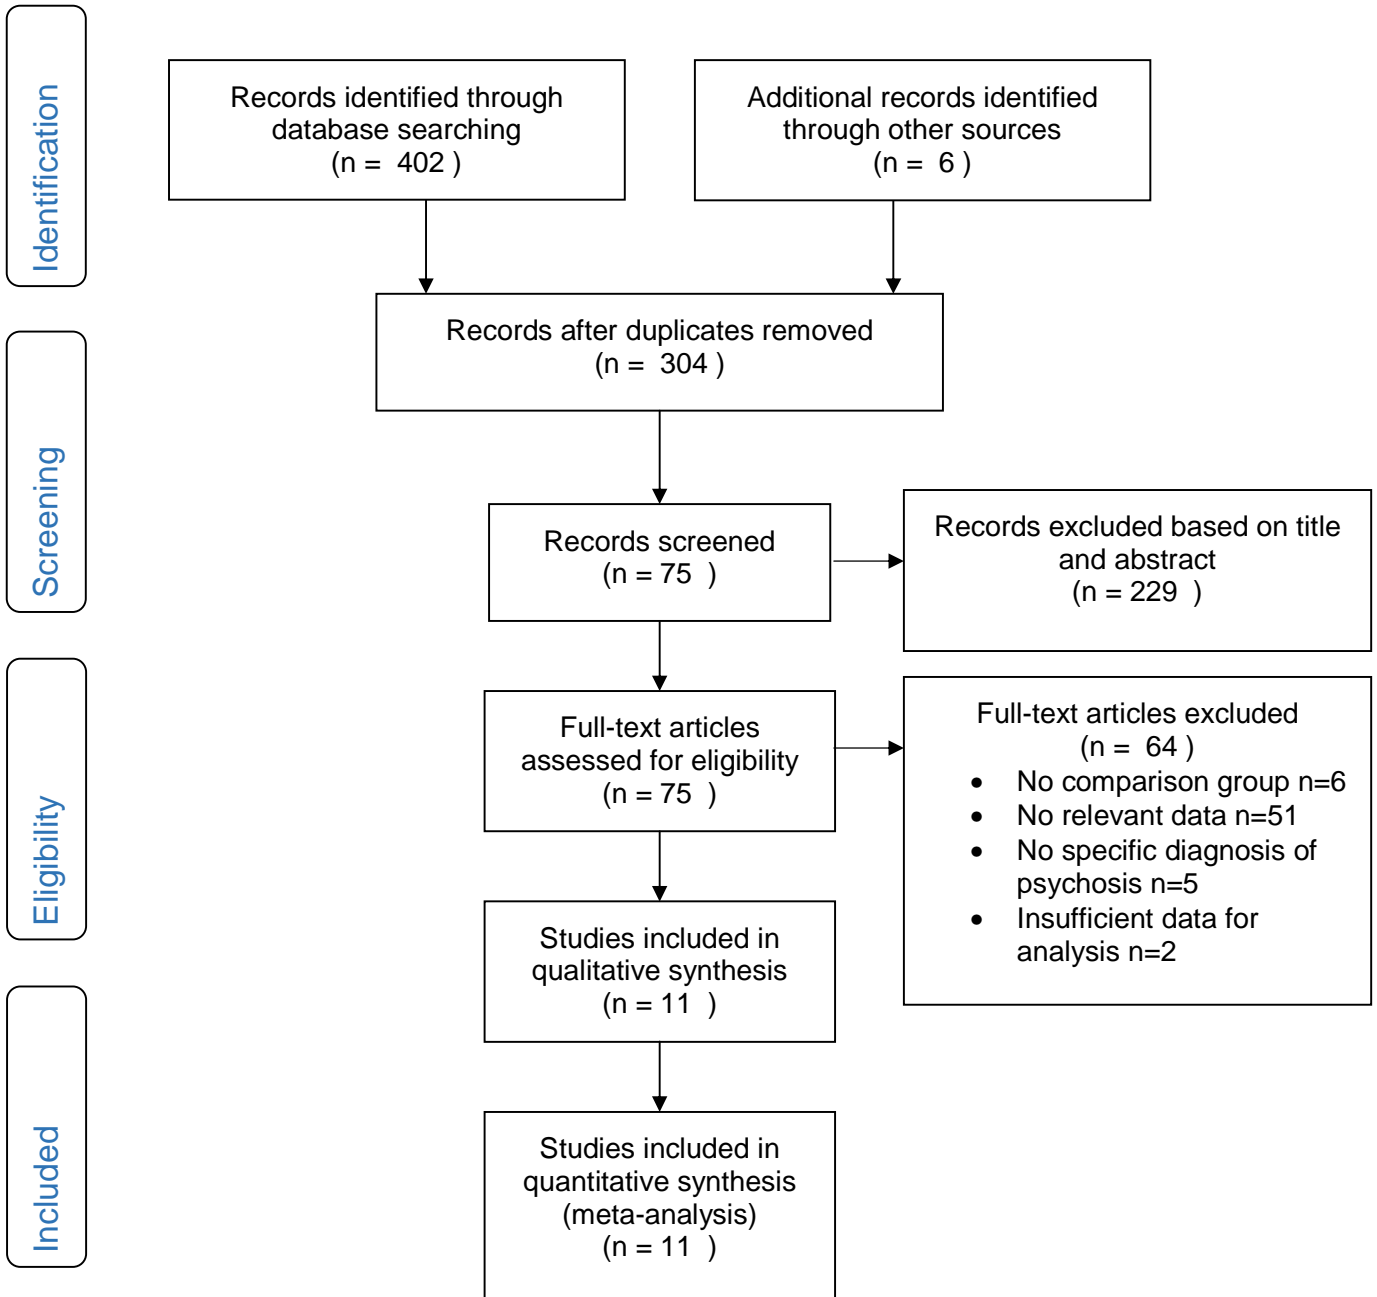

**Table of studies included in systematic review and meta-analysis**

| Source                              | Time period studied | Country       | Data source                                 | Study population | Control population | Covariates for adjusted odds ratio                                                                          | Quality |
|-------------------------------------|---------------------|---------------|---------------------------------------------|------------------|--------------------|-------------------------------------------------------------------------------------------------------------|---------|
| Carney and Jones, 2018              | 1996-2001           | United States | Claims data                                 | 525              | 131683             | age, nonmental health care visits to PCPs and ob/gyns, months of eligibility, urban/rural, substance use dx | High    |
| Chochinov et al., 2009              | 2002-2004           | Canada        | Claims data                                 | 1448             | 108792             | age, income, geographic province, primary care services, co-morbidity                                       | High    |
| Dickerson et al., 2002              | 1999-2000           | United States | Survey                                      | 42               | 480                | age, race/ethnicity, marital status, education, income, insurance source                                    | High    |
| Domino et al., 2014                 | 2008-2010           | United States | Claims data linked to mental health records | 15636            | 5924               | age, receipt of ACT/psychotherapy                                                                           | Medium  |
| Jensen et al., 2016                 | 2008-2009           | Denmark       | National registry                           | 1022             | 96616              | socioeconomic status, race/ethnicity, marital status, education                                             | High    |
| Lasser et al., 2003 <sup>a</sup>    | 1998-2003           | United States | Survey linked to medical records            | 12               | 293                |                                                                                                             | High    |
| Lindamer et al., 2003               | 1996-2001           | United States | Survey linked to medical records            | 65               | 51                 | age, education, race/ethnicity, marital status, ob/gyn health history                                       | Low     |
| Salsberry et al., 2005 <sup>b</sup> | 1996-1998           | United States | Claims data                                 | 60               | 16220              | age, race/ethnicity, chronic medical conditions                                                             | Medium  |
| Thomas et al., 2018 <sup>b</sup>    | 2010-2011           | United States | Claims data                                 | 6335             | 16836              | race/ethnicity, urban/rural, diagnosis, substance use, nonpsychiatric health care use                       | Medium  |
| Werneke et al., 2006                | 1996-1998           | England       | Linkage with national registry              | 55               | 44195              | age, race/ethnicity, geographic region, socioeconomic status, severity of psychiatric illness               | High    |
| Woodhead et al., 2016 <sup>a</sup>  | 2013                | England       | Linkage with national registry              | 247              | 25385              | age, race/ethnicity, deprivation, medical consultations                                                     | High    |

<sup>a</sup>These authors were contacted for discrepancies in their calculations; corrected values are presented here.

<sup>b</sup>These studies reference data from the National Health Interview Survey (NHIS). Control population numbers were drawn from the 1997 (Salsberry) and 2010 (Thomas) NHIS reports.
